# Supplementary material for: A central circadian oscillator confers defense heterosis in hybrids without growth vigor costs
Source: PubMed Central journal article supplement (PMC8055661; doi:10.1038/s41467-021-22268-z), 2021-04-19
Supplement: 41467_2021_22268_MOESM1_ESM.pdf [file 41467_2021_22268_MOESM1_ESM.pdf]

# Supplementary Figures:

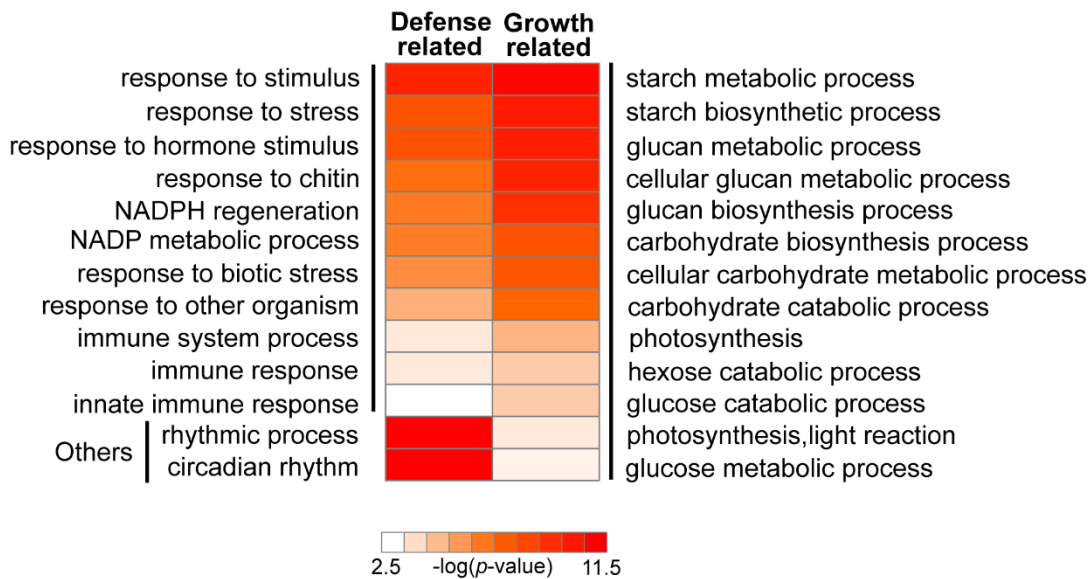

**Supplementary Fig. 1. ‘evening element’- containing above-high parent DEGs are involved in defence- and growth-related or circadian rhythm pathways.**

Selected Gene Ontology (GO) categories for ‘evening element’- containing DEGs with ‘above-high parent’ expression pattern in the F<sub>1</sub> hybrids at 1-, 2-, and 3-days post infiltration with *Pst* DC3000. These DEGs are involved in defence- and growth-related pathways or the circadian rhythm pathway. DEGs, differentially expressed genes.

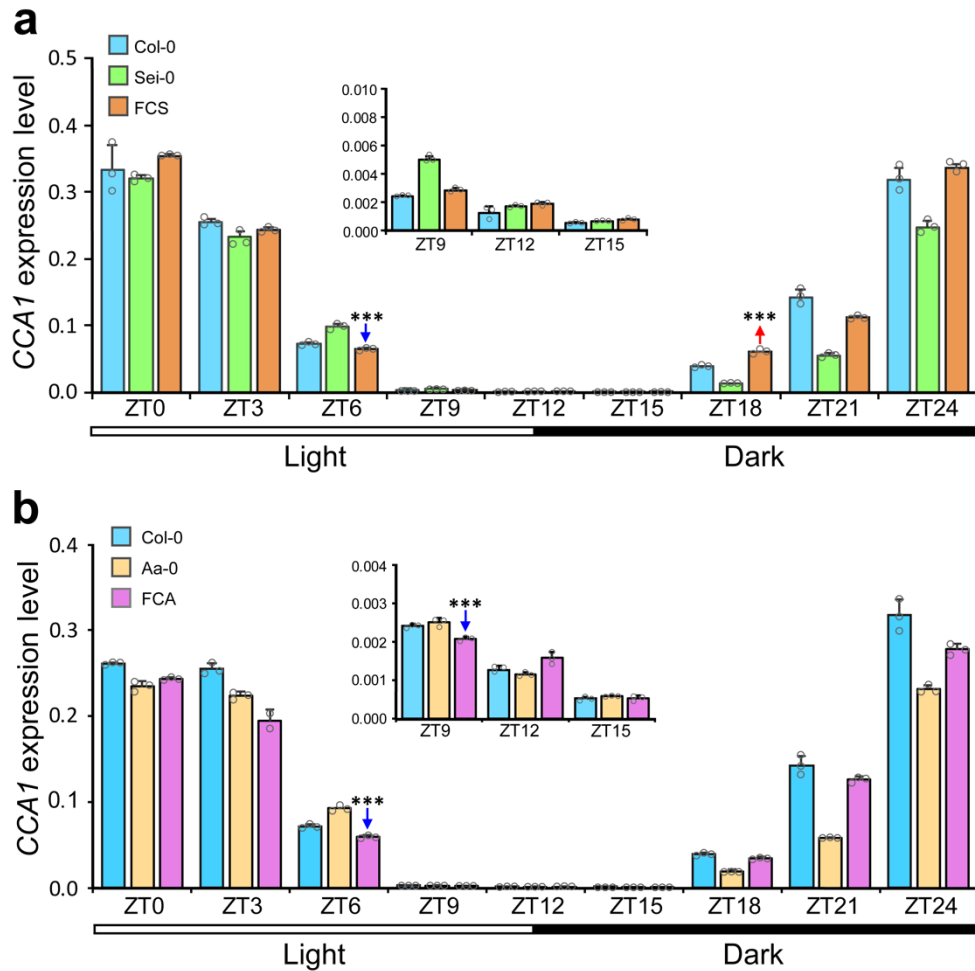

**Supplementary Fig. 2. Above-high parent expression of *CCA1* in hybrids at ZT21 did not occur without pathogen invasion.**

**a, b** Quantitative RT-PCR analysis of *CCA1*'s expression level in F<sub>1</sub> hybrids and parents of Col-0 × Sei-0 (**a**) and Col-0 × Aa-0 (**b**) (*ACTIN2* as a control) in a 24-h period (12-h light/12-h dark cycles) starting from dawn (ZT0, 9:00) without infiltration of *Pst* DC3000. Data are shown as the mean ± SD (n = 3, n indicates biological replicates). Arrows indicate significant up-(red) and down-(blue) regulation of *CCA1* in the F<sub>1</sub> hybrids compared to mid-parent value. The *p*-values in **a** are 6.2E-04 for ZT6 and 9.1E-05 for ZT18. The *p*-values in **b** are 3.13E-04 for ZT6 and 5.0E-04 for ZT9. The results are representative of three independent experiments, with measurements that were taken from independent samples grown and processed at different times. ‘\*\*\*’ *p* value < 0.001 (two-tailed Student's *t* test).

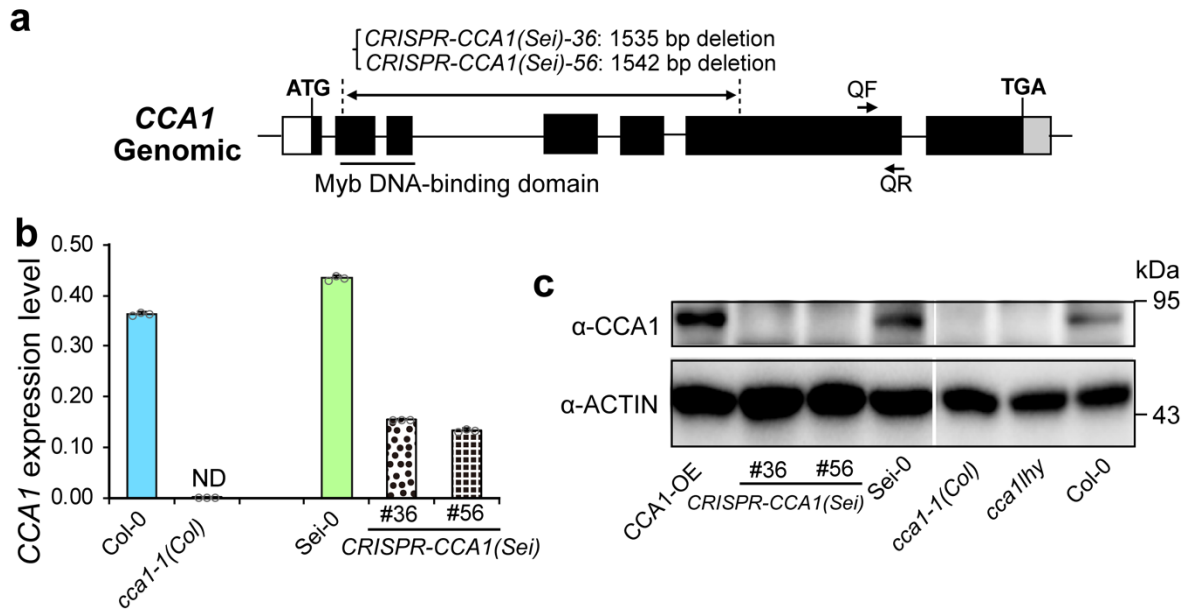

**Supplementary Fig. 3. Gene model and transcript/translation level of *CCA1* mutants.**

**a** Gene model of *CCA1-CRISPR* mutants in the *Sei-0* background. White box, promoter; black boxes, exons; gray boxes, 3'UTR. Lines with arrowheads indicate the fragment deleted in *CRISPR* mutants. Primers used to test the transcript level of *CCA1* are indicated by arrows. **b, c** The transcript (**b**) and translation (**c**) level of *CCA1-CRISPR* mutants and the wild-type at ZT0. The transcript level of *CCA1* (ZT0, 12-day-old seedlings) is shown as the mean  $\pm$  SD (n = 3, n indicates biological replicates) and is standardized for the abundance of the *ACTIN2* transcript.

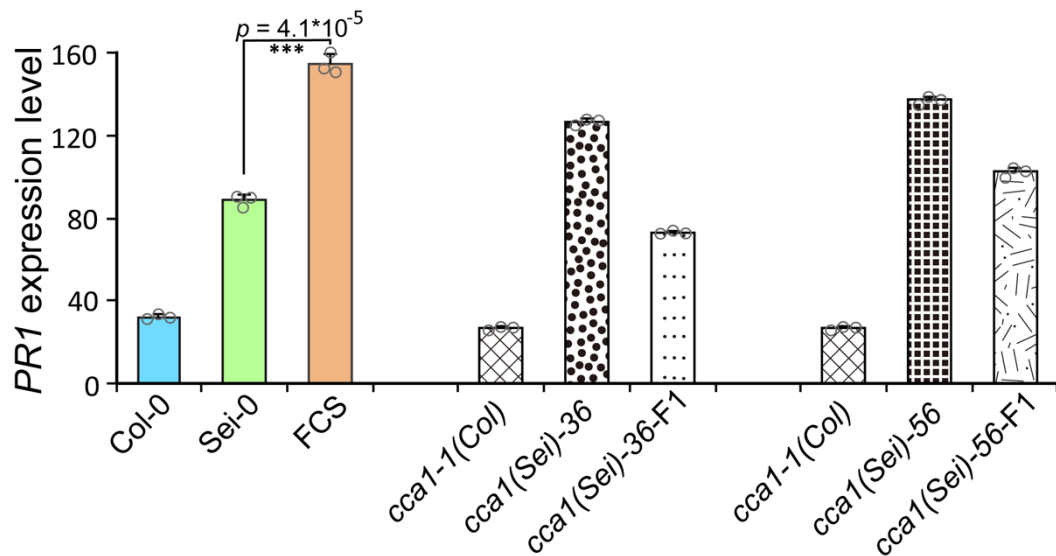

**Supplementary Fig. 4. The expression level of *PR1* in wild-type and *CCA1*-mutated hybrids and parents.**

qPCR analyses of *PR1*'s expression level of the wild-type and *CCA1*-mutated F<sub>1</sub> hybrids and parents at 24 hours post infiltration with *Pst* DC3000. The expression level of *PR1* was shown as the mean  $\pm$  SD (n = 3, n indicates biological replicates). Data are standardized for the abundance of the *ACTIN2* transcript. ‘\*\*\*’ *p* value < 0.001 (two-tailed Student's *t* test).

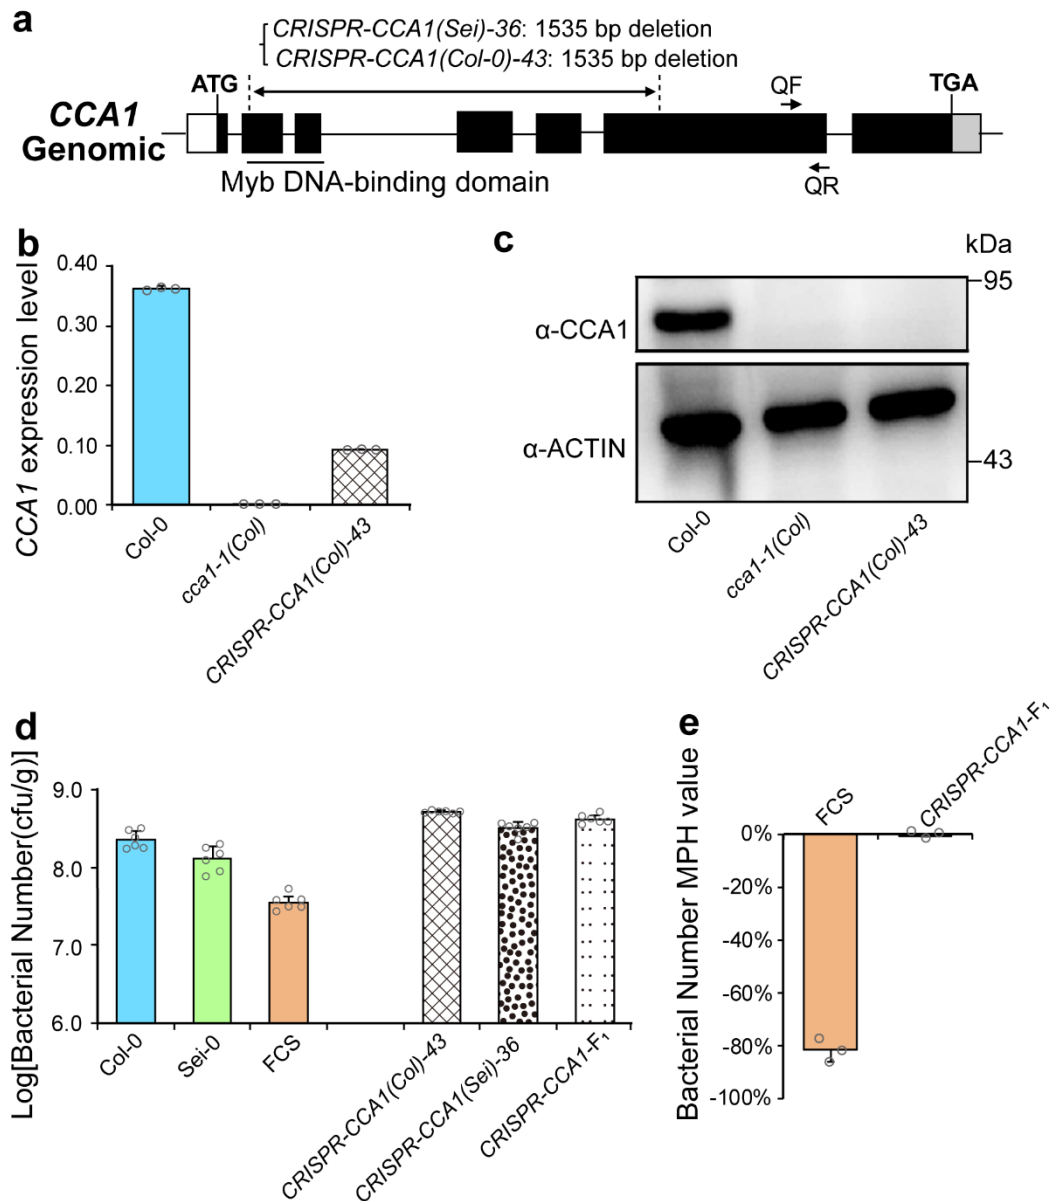

**Supplementary Fig. 5. *CCA1* is the key regulator of heterosis for defence.**

**a** Gene model of *CCA1*-*CRISPR* mutants in Col-0 and Sei-0 background. White box, promoter; black boxes, exons; gray boxes, 3'UTR. Lines with arrowheads indicate the fragment deleted in *CRISPR* mutants. Primers used to test the transcript level of *CCA1* are indicated by arrows. **b, c** The transcript (**b**) and translation (**c**) level of *CCA1* mutants and Col-0 at ZT0. The transcript level of *CCA1* (ZT0, 12-day-old seedlings) is shown as the mean  $\pm$  SD ( $n = 3$ ,  $n$  indicates biological replicates) and standardized for the abundance of the *ACTIN2* transcript. **d** Bacterial titer (log10) at 5 days post infiltration with *Pst* DC3000 for the wild-type and *CCA1*-mutated F<sub>1</sub> hybrids and parents. Bacterial

growth is expressed as the mean value of viable bacteria per gram of leaf tissue  $\pm$ SD (n = 6, n indicates biological replicates). **e** Mid-parent heterosis (MPH) value calculated by bacterial number at 5 days post infiltration with *Pst* DC3000 for wild-type and *CCA1*-mutated F<sub>1</sub> hybrids. Data are shown as the mean  $\pm$  SD. The results in **d** and **e** are representative of three independent experiments, with measurements that were taken from independent samples grown and processed at different times.

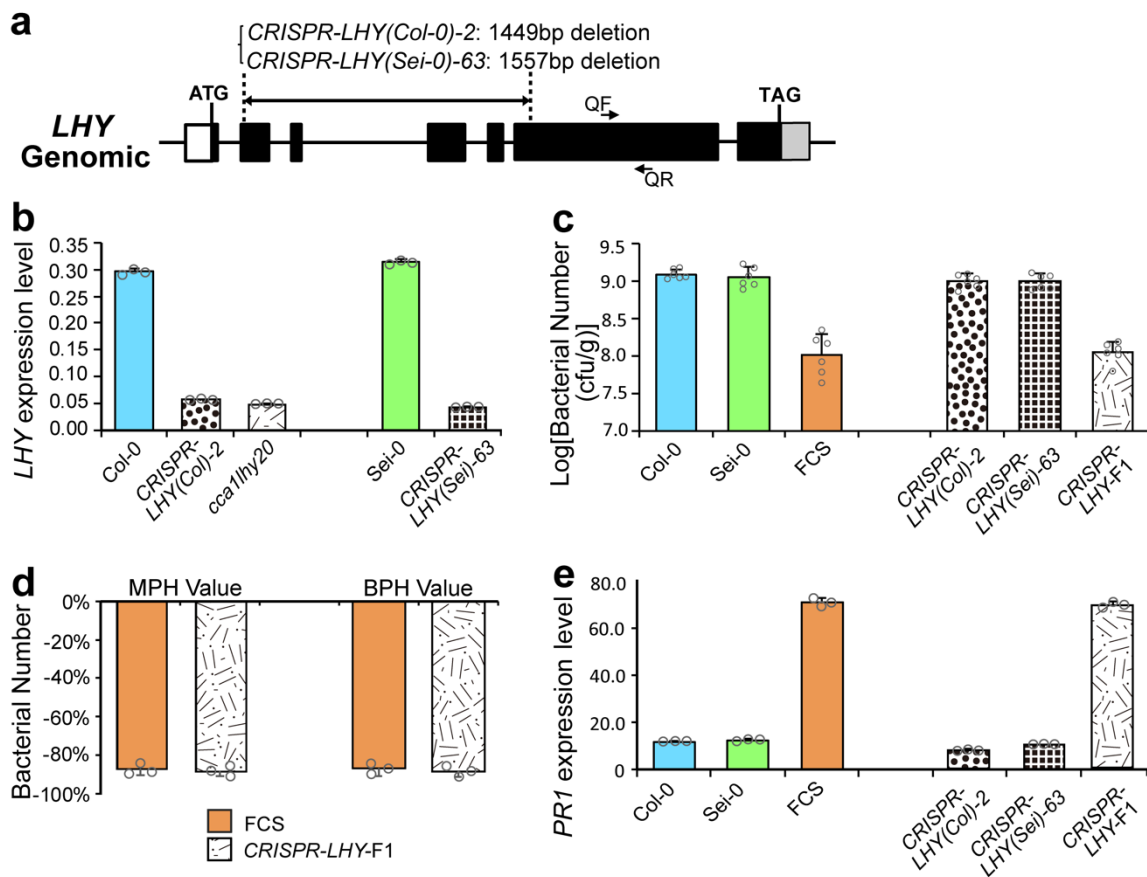

**Supplementary Fig. 6. Mutation of *LHY* did not influence the defence heterosis of FCS hybrids.**

**a** Gene model of *LHY*-CRISPR mutants in Col-0 and Sei-0 background. White box, promoter; black boxes, exons; gray boxes, 3'UTR. Lines with arrowheads indicate the fragment deleted in CRISPR mutants. Primers used to test the transcript level of *LHY* are indicated by arrows. **b** The transcript level of *LHY* mutants and the wild-type. The transcript level of *LHY* (ZT0, 12-day-old seedlings) is shown as the mean  $\pm$  SD (n = 3, n indicates biological replicates) and standardized for the abundance of the *ACTIN2* transcript. **c** Bacterial titer (log10) at 5 days post infiltration with *Pst* DC3000 in the wild-type and *LHY*-mutated F<sub>1</sub> hybrids and parents. Bacterial growth is expressed as the mean values of viable bacteria per gram of leaf tissue  $\pm$  SD (n = 6, n means biological replicates). **d** Mid-parent heterosis (MPH) value and Best-parent heterosis (BPH) value calculated by bacterial number at 5 days post infiltration with *Pst* DC3000 for the wild-type and *LHY*-mutated F<sub>1</sub> hybrids. Data are shown as the mean  $\pm$  SD. **e** qPCR analyses

of *PR1*'s expression level of wild-type and *LHY*-mutated F<sub>1</sub> hybrids and parents at 24 hours post infiltration with *Pst* DC3000. The expression level of *PR1* is shown as the mean  $\pm$  SD (n = 3, n indicates biological replicates). Data are standardized for the abundance of the *ACTIN2* transcript. The results in **c** to **e** are representative of three independent experiments, with measurements that were taken from independent samples grown and processed at different times.



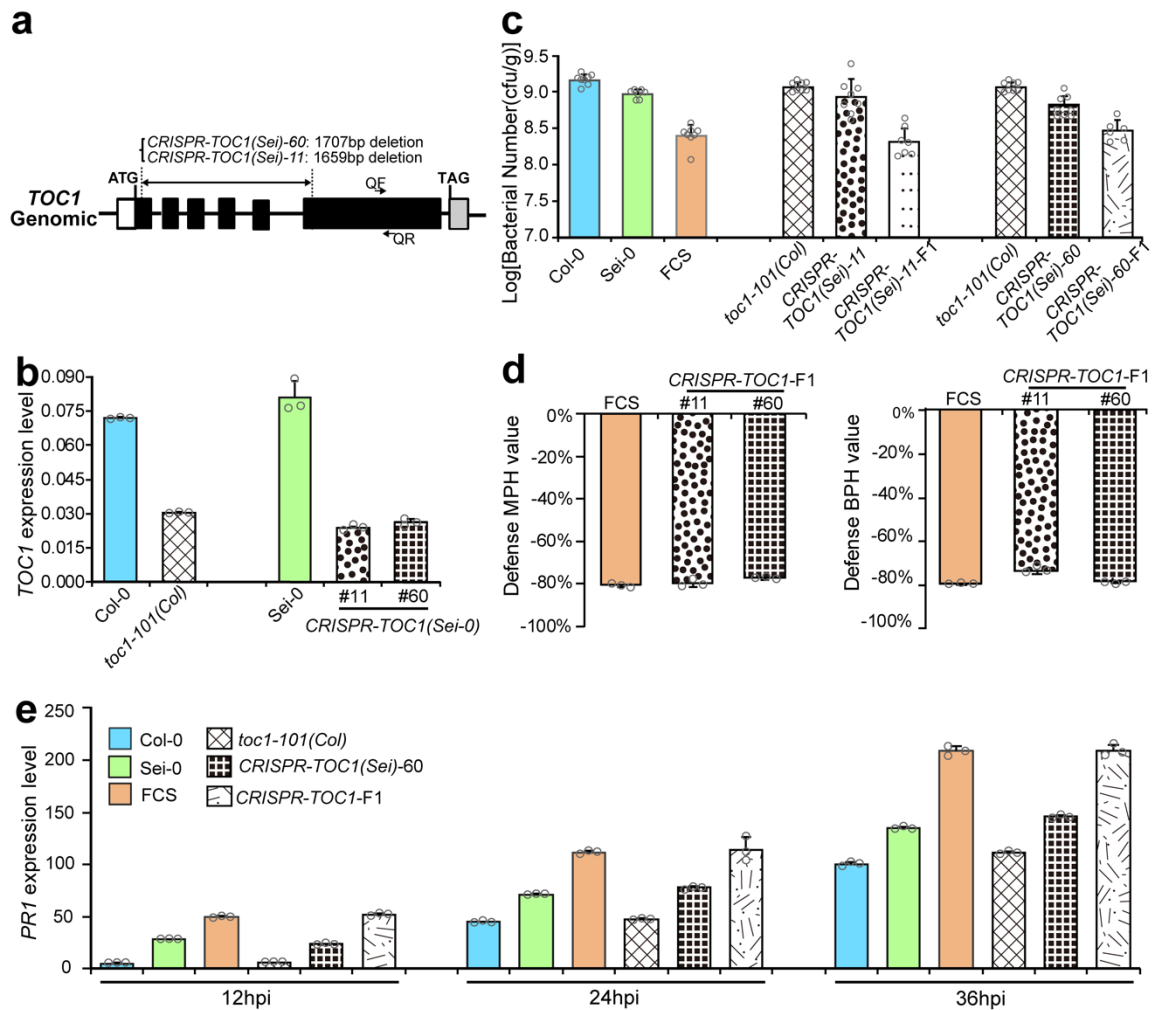

### Supplementary Fig. 7. Mutation of *TOC1* did not influence defence heterosis of FCS hybrids.

**a** Gene model of *TOC1*-CRISPR mutants in the Sei-0 background. White box, promoter; black boxes, exons; gray boxes, 3'UTR. Lines with arrowheads indicate the fragment deleted in CRISPR mutants. Primers used to test the transcript level of *TOC1* are indicated by arrows. **b** Transcript level of *TOC1* mutants and the wild-type at ZT12. The transcript level of *TOC1* (ZT12, 12-day-old seedlings) is shown as the mean  $\pm$  SD ( $n = 3$ ,  $n$  indicates biological replicates) and standardized for the abundance of the *ACTIN2* transcript. **c** Bacterial titer (log10) of the wild-type and *TOC1*-mutated F<sub>1</sub> hybrids and parents at 5 days post infiltration with *Pst* DC3000. Bacterial growth is expressed as the mean values of viable bacteria per gram of leaf tissue  $\pm$  SD ( $n = 6$ ,  $n$  indicates biological replicates). **d** Mid-parent heterosis (MPH) and Best-parent heterosis (BPH) values

calculated by bacterial number at 5 days post infiltration with *Pst* DC3000 for the wild-type and *TOC1*-mutated F<sub>1</sub> hybrids. Data are shown as the mean  $\pm$ SD. **e** qPCR analyses of *PR1*'s expression level of the wild-type and *TOC1*-mutated F<sub>1</sub> hybrids and parents at 12, 24 and 36 hours post infiltration with *Pst* DC3000. The expression level of *PR1* was shown as the mean  $\pm$ SD (n = 3, n indicates biological replicates). Data are standardized for the abundance of the *ACTIN2* transcript. The results in **c** to **e** are representative of three independent experiments, with measurements that were taken from independent samples grown and processed at different times.

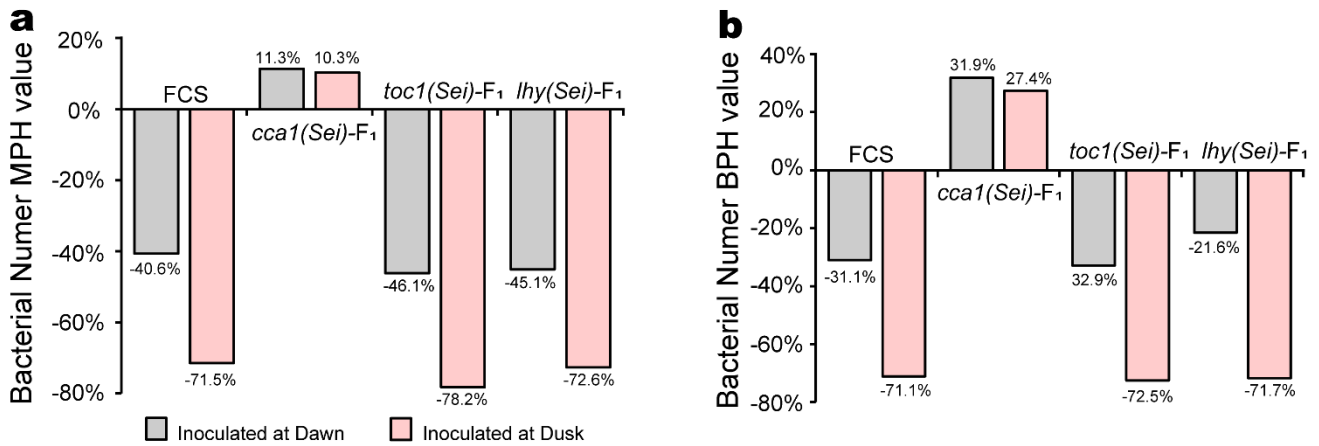

**Supplementary Fig. 8. Mutation of *LHY* and *TOC1* didn't influence the increased degree of defence heterosis when inoculated at 'dusk' compared with that at 'dawn'.**

Mid-parent heterosis (MPH) (a) and Best-parent heterosis (BPH) values (b) of the wild-type and *CCA1*, *LHY*, and *TOC1*-mutated F<sub>1</sub> hybrids which were calculated by bacterial number at 5 days post infiltration at dawn and at dusk, respectively. Because the bacterial number at 5 days post infiltration in FCS was significantly less than that in its parents, both the MPH and BPH value of FCS represented by the bacterial number have a negative value in the figure.

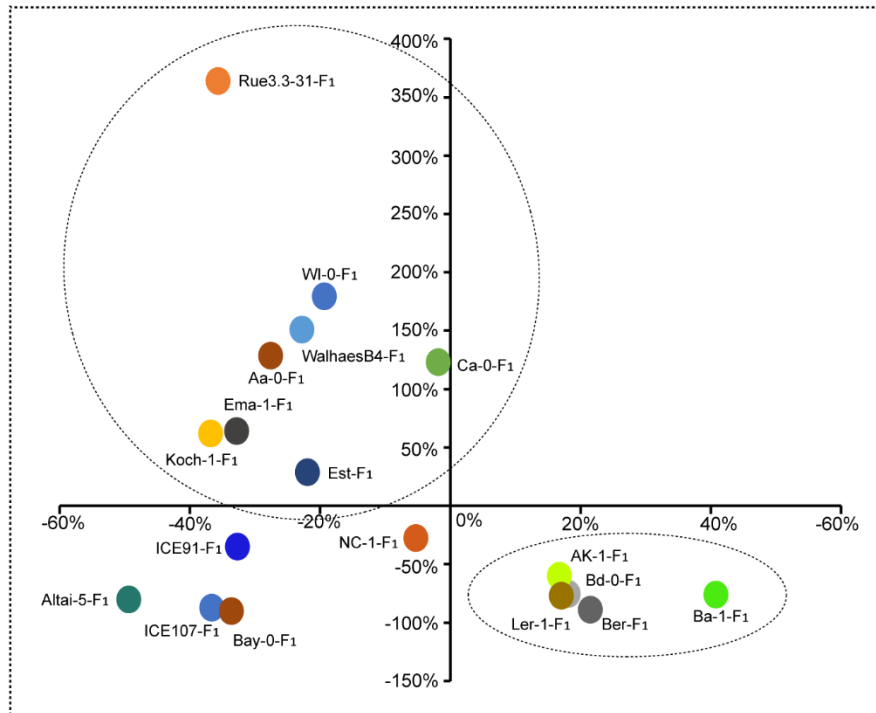

**Supplementary Fig. 9. *CCA1* is a common regulator that contributes to heterosis for defence in different *Arabidopsis* hybrids.**

Mid-parent heterosis (MPH) value calculated by the bacterial number at 5 days post infiltration (dpi) with *Pst* DC3000 and *CCA1*'s expression level at 21 hours post infiltration (hpi) with *Pst* DC3000 in 18 F<sub>1</sub> hybrids. The 13 F<sub>1</sub> hybrids (72.2%) that are circled show increased or decreased expression of *CCA1* at 21 hpi compared with the mid-parent value (MPV), and, respectively, show heterosis or no heterosis for defence at 5 dpi.

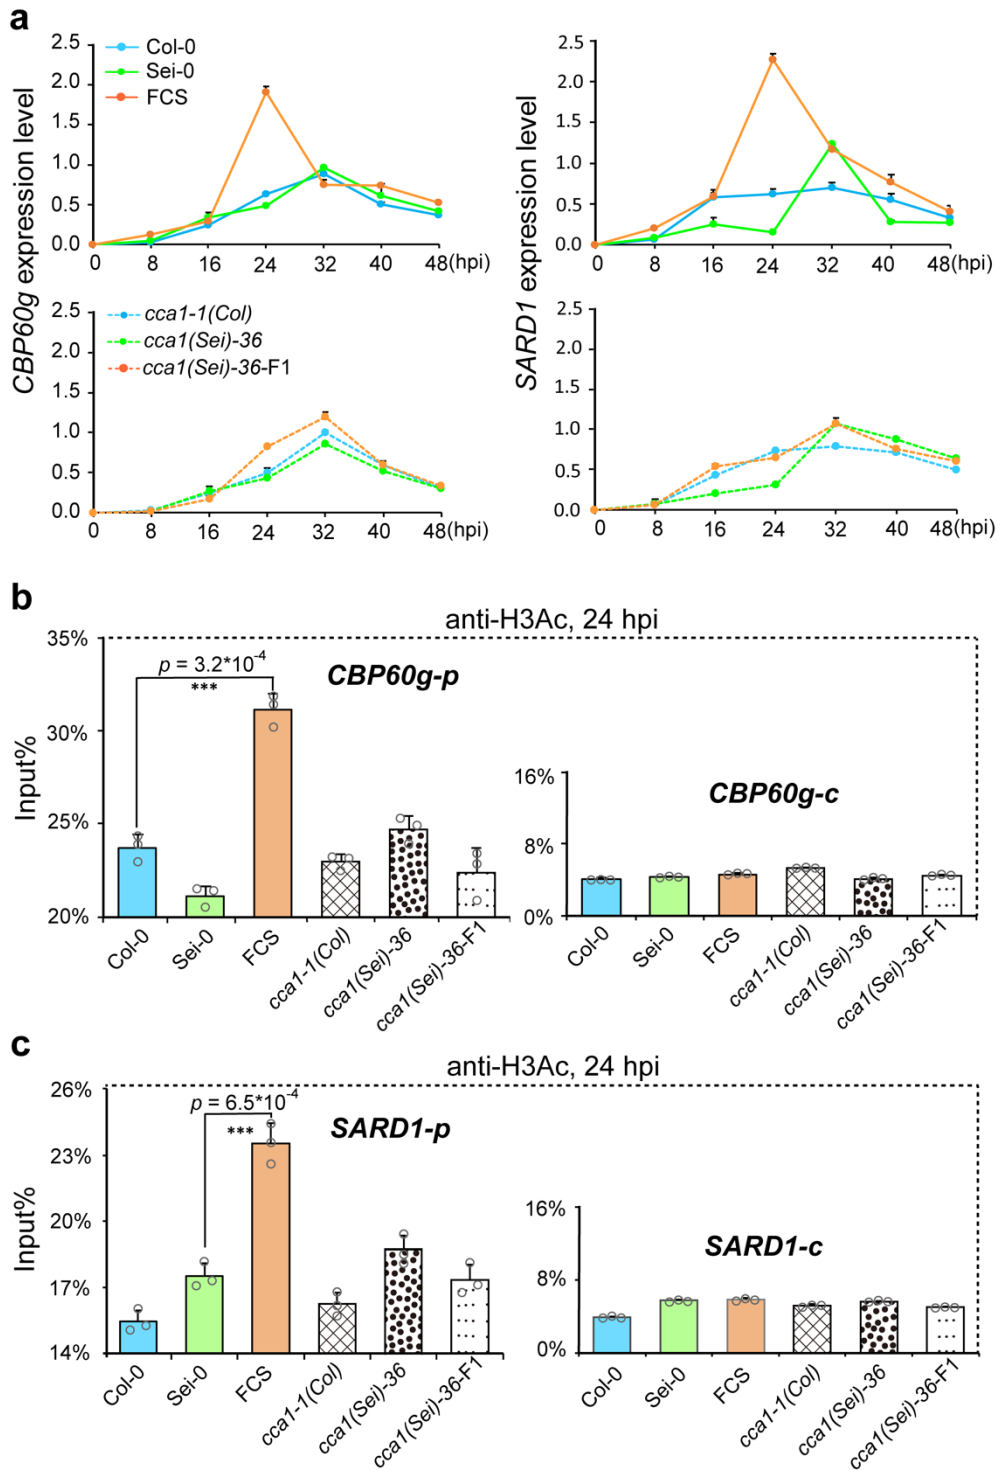

**Supplementary Fig. 10. *CCA1* controls the above-high parent expression of *SARD1* and *CBP60g* in hybrids through up-regulation of their H3 acetylation.**

**a** qPCR analyses of *SARD1*'s and *CBP60g*'s expression level in F<sub>1</sub> hybrids and the parents of Col-0 × Sei-0 and *cca1-1* × *cca1(Sei)-36* every 8 hours post-infiltration up to 48 hours. The expression level of *SARD1* and *CBP60g* are shown as the mean ± SD (n = 3, n indicates biological replicates). Data are standardized for the abundance of the

*ACTIN2* transcript. hpi: hours post infiltration with *Pst* DC3000. **b, c** ChIP-qPCR analyses of promoter fragments (*SARD1-p* and *CBP60g-p*) and exon fragments (*SARD1-c* and *CBP60g-c*) of *SARD1* (**b**) and *CBP60g* (**c**) in wild-type F<sub>1</sub> hybrids and their parents using an anti-H3Ac antibody at 24 hours post infiltration with *Pst* DC3000. ChIP values were normalized to their respective DNA inputs. The results are representative of three independent experiments, with measurements taken from independent samples grown and processed at different times. Data are shown as the mean  $\pm$  SD (n = 3, n indicates biological replicates). ‘\*\*\*’ *p* value < 0.001 (two-tailed Student’s *t* test).

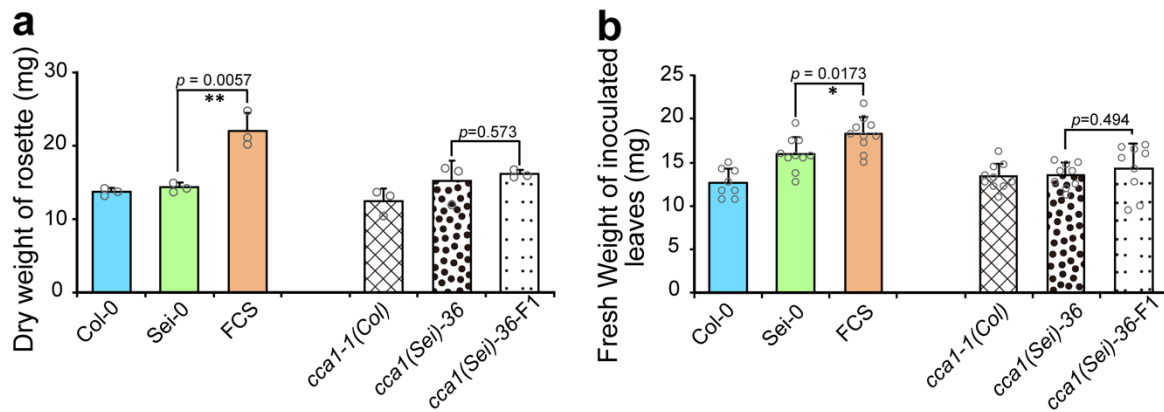

**Supplementary Fig. 11. Hybrids achieved significant defence heterosis without consuming growth vigor is completely dependent on *CCA1*.**

**a** Dry weight of the whole rosette of the wild-type and *CCA1*-mutated F<sub>1</sub> hybrids and parents at 5 days post infiltration with *Pst* DC3000. Data are shown as the mean  $\pm$  SD (n = 30 plants for each genotype). **b** Fresh weight of inoculated leaves of the wild-type and *CCA1*-mutated F<sub>1</sub> hybrids and parents at 5 days post infiltration with *Pst* DC3000. Data are shown as the mean  $\pm$  SD (n = 6, n indicates biological replicates, 5 leaves for each biological replicate). “\*” *p* value < 0.05 and “\*\*” *p* value < 0.01 (two-tailed Student’s *t* test).

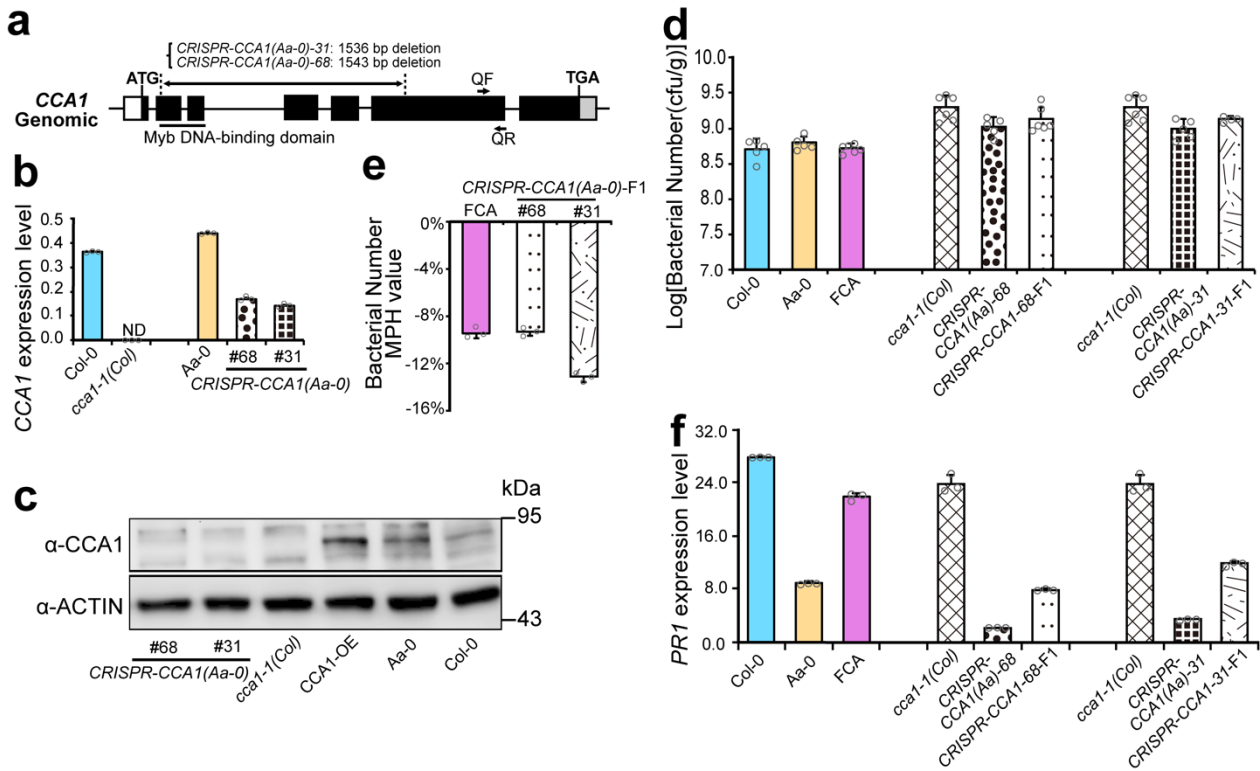

**Supplementary Fig. 12. Mutation of *CCA1* results in a lack of heterosis for defence in FCA hybrids.**

**a** Gene model of the *CCA1-CCRISPR* mutants in the Aa-0 background. White box, promoter; black boxes, exons; gray boxes, 3'UTR. Lines with arrowheads indicate the fragment deleted in *CRISPR* mutants. Primers used to test the transcript level of *CCA1* are indicated by arrows. **b, c** The transcript (**b**) and translation (**c**) levels of *CCA1* mutants and wild-type. The expression level of *CCA1* (ZT0, 12-day-old seedlings) is shown as the mean  $\pm$ SD ( $n = 3$ ,  $n$  indicates biological replicates). Data are standardized for the abundance of the *ACTIN2* transcript. **d** Bacterial titer (log10) of the wild-type and *CCA1*-mutated F<sub>1</sub> hybrids and parents at 5 days post infiltration with *Pst* DC3000. Bacterial growth is expressed as the mean values of viable bacteria per gram of leaf tissue  $\pm$ SD ( $n = 6$ ,  $n$  indicates biological replicates). **e** Mid-parent heterosis (MPH) value calculated by bacterial number at 5 days post infiltration with *Pst* DC3000 for wild-type and *CCA1*-mutated F<sub>1</sub> hybrids. Data are shown as the mean  $\pm$ SD. **f** qPCR analyses of *PRI*'s expression level of wild-type and *CCA1*-mutated F<sub>1</sub> hybrids and parents at 24 hours post infiltration with *Pst* DC3000. The expression level of *PRI* was



shown as the mean  $\pm$ SD (n = 3, n indicates biological replicates). Data are standardized for the abundance of the *ACTIN2* transcript. The results in **d-f** are representative of three replicates, with measurements taken from independent samples grown and processed at different times.

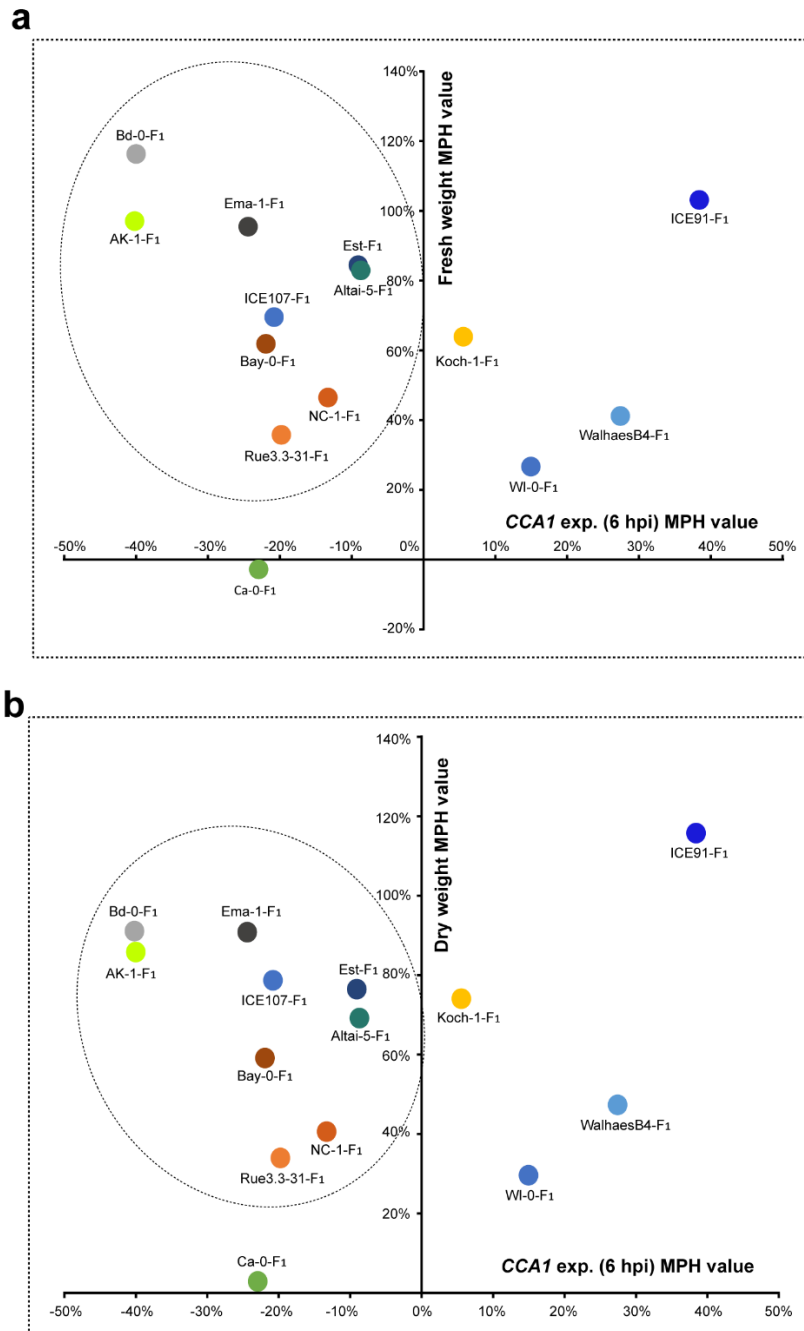

**Supplementary Fig. 13. *CCA1* is a common regulator that contributes to heterosis for growth in different *Arabidopsis thaliana* hybrids.**

Mid-parent heterosis (MPH) value calculated by the rosette fresh weight (**a**) or dry weight (**b**) at 5 days post infiltration (dpi) with *Pst* DC3000 and the *CCA1*'s expression level at 6 hours post infiltration (hpi) with *Pst* DC3000 in 14 F<sub>1</sub> hybrids. Nine F<sub>1</sub> hybrids (64.3%) that are circled show decreased expression of *CCA1* compared with the mid-parent value (MPV) at 6 hpi show heterosis for growth at 5 dpi.

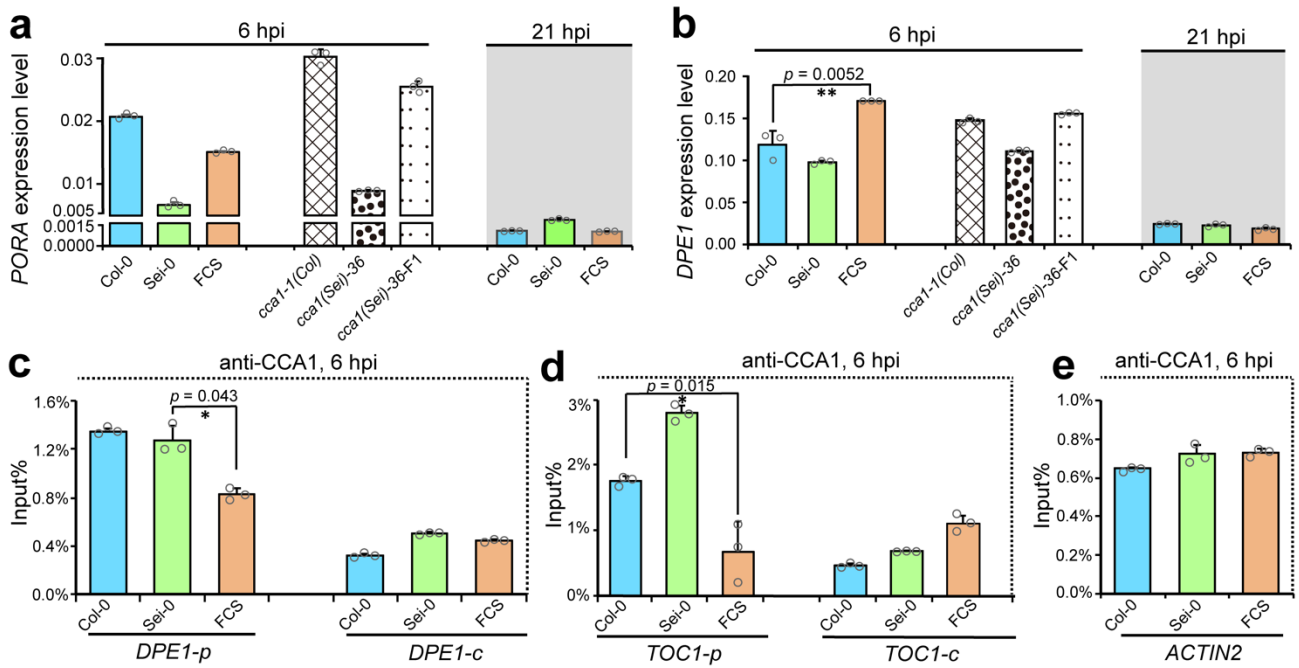

**Supplementary Fig. 14. CCA1 binds to growth-related genes and regulates their differential expression between hybrids and parents after pathogen invasion.**

**a, b** qPCR analyses of the expression level of *PORA* and *DPE1* in F<sub>1</sub> hybrids and the parents of Col-0 × Sei-0 at 6 and 21 hpi with *Pst* DC3000 and of *cca1-1(Col)* × *cca1(sei)-36* at 6 hpi with *Pst* DC3000. The expression level of *PORA* (**a**) and *DPE1* (**b**) were shown as the mean ± SD (n = 3, n indicates biological replicates). Data are standardized for the abundance of the *ACTIN2* transcript. **c, d** ChIP-qPCR analyses of promoter fragments that contained the ‘evening element’ motif (*TOC1-p* and *DPE1-p*) and exon fragments (*TOC1-c* and *DPE1-c*) of *TOC1* (**c**) and *DPE1* (**d**) in F<sub>1</sub> hybrids and their parents using the CCA1 antibody at 6 hpi with *Pst* DC3000. *TOC1* was selected as a positive control, indicating that there were no problems with either the CCA1 antibody or the ChIP system. **e** ChIP-qPCR analyses of *ACTIN2* in F<sub>1</sub> hybrids and their parents using the CCA1 antibody at 6 hpi with *Pst* DC3000. *ACTIN2* was selected as a negative control. ChIP values in **c, d, e** were normalized to their respective DNA inputs. The results are representative of three independent experiments, with measurements taken from independent samples grown and processed at different times. Data are shown as the mean ± SD (n = 3, n indicates biological replicates). hpi: hours post infiltration. ‘\*’  $p$  value < 0.05 and ‘\*\*’  $p$  value < 0.01 (two-tailed Student’s *t* test).

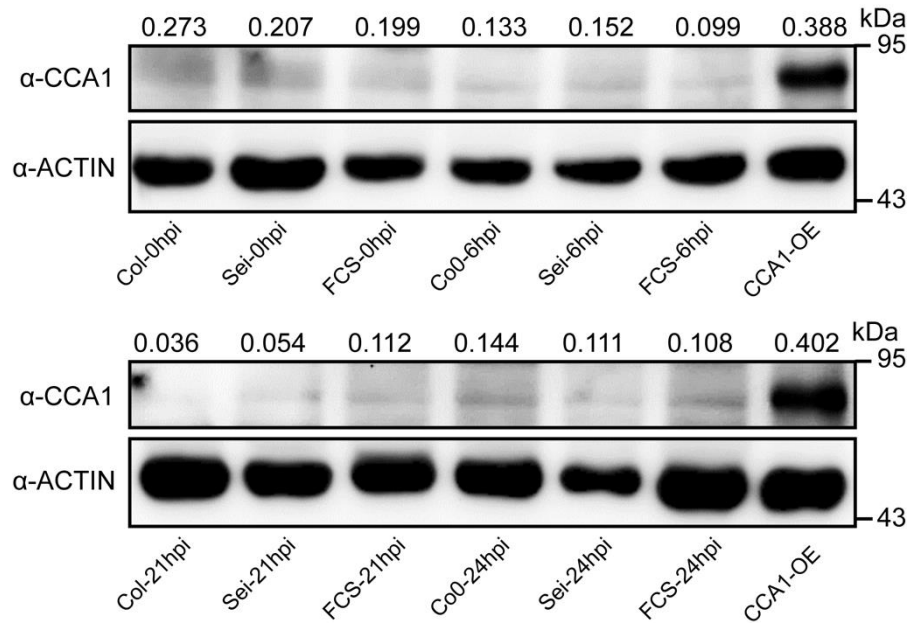

**Supplementary Fig. 15. CCA1 proteins were differentially expressed between the FCS hybrids and parents at both 6 hpi and 21 hpi.**

Numbers above the bands indicated the intensities of CCA1 protein normalized to ACTIN, which calculated by image J software. CCA1-OE was used as a positive control. ACTIN was used as a loading control.

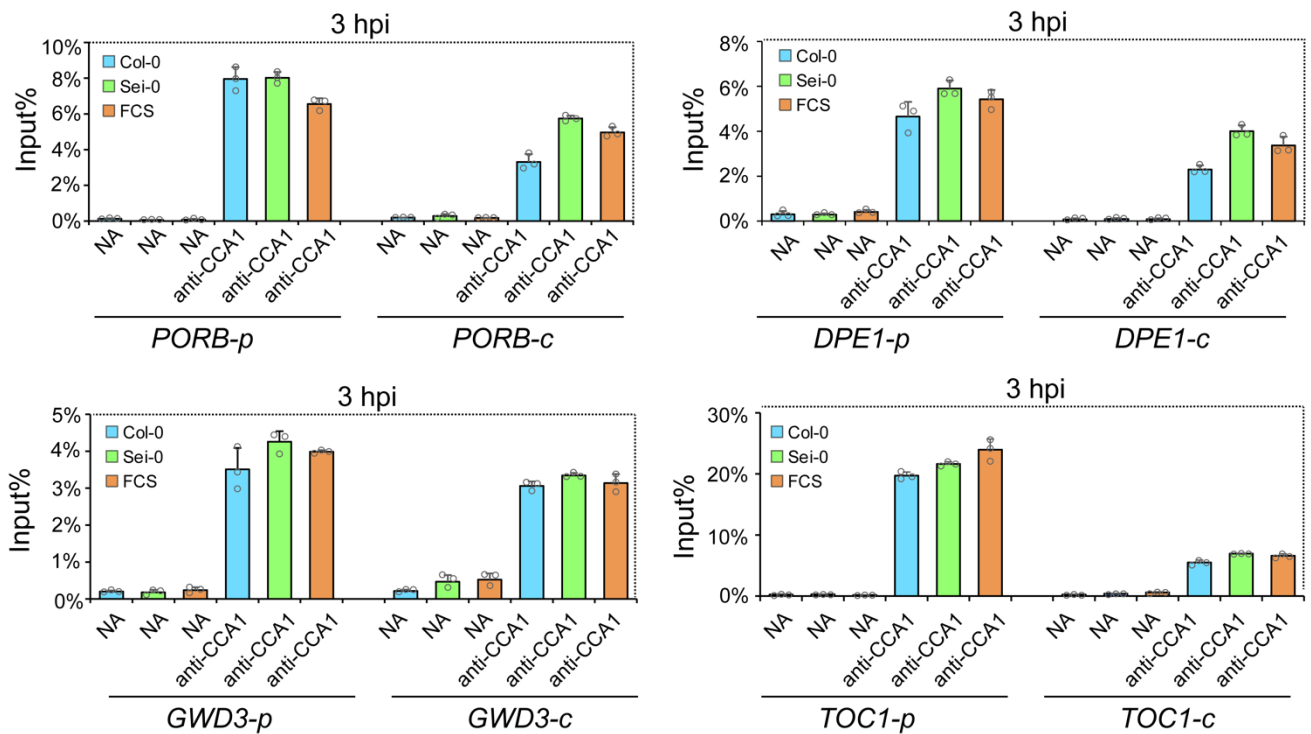

**Supplementary Fig. 16. Enrichment of *CCA1* on the promoter of chlorophyll biosynthetic and starch degradation genes showed no difference between the FCS hybrids and parents at 3 hpi.**

ChIP-qPCR analyses of promoter fragments that contained ‘evening element’ motif (*PORB-p*, *GWD3-p*, *DPE1-p* and *TOC1-p*) and exon fragments (*PORB-c*, *GWD3-c*, *DPE1-c* and *TOC1-c*) of *PORB*, *GWD3*, *DPE1* and *TOC1* in F<sub>1</sub> hybrids and their parents using an anti-CCA1 antibody at 3 hpi. The ChIP values were normalized to their respective DNA inputs. The results are representative of three independent experiments, with measurements that were taken from independent samples grown and processed at different times. Data are shown as the mean  $\pm$  SD (n = 3, n indicates biological replicates). hpi, hours post inoculation.

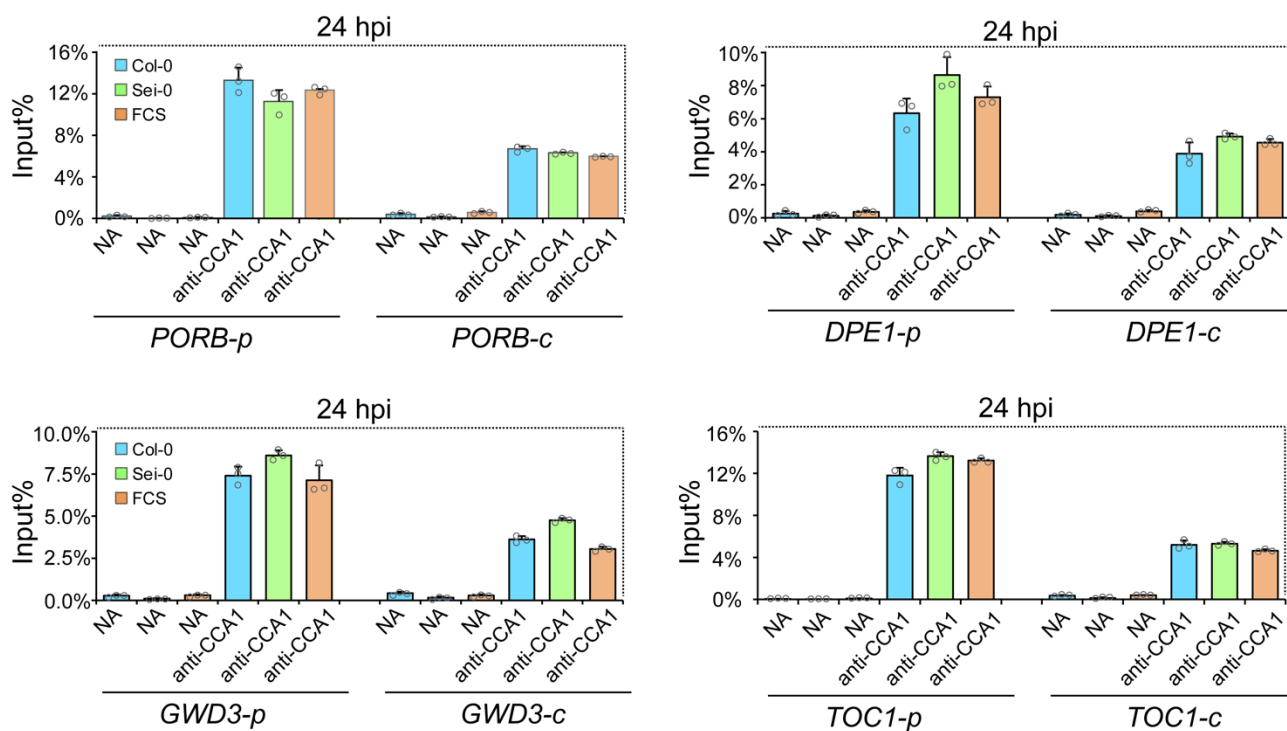

**Supplementary Fig. 17. Enrichment of *CCA1* on the promoter of chlorophyll biosynthetic and starch degradation genes showed no difference between the FCS hybrids and parents at 24 hpi.**

ChIP-qPCR analyses of promoter fragments that contained ‘evening element’ motif (*PORB-p*, *GWD3-p*, *DPE1-p* and *TOC1-p*) and exon fragments (*PORB-c*, *GWD3-c*, *DPE1-c* and *TOC1-c*) of *PORB*, *GWD3*, *DPE1* and *TOC1* in F<sub>1</sub> hybrids and their parents using an anti-*CCA1* antibody at 24 hpi. ChIP values were normalized to their respective DNA inputs. The results are representative of three independent experiments, with measurements that were taken from independent samples grown and processed at different times. Data are shown as the mean  $\pm$  SD (n = 3, n indicates biological replicates). hpi, hours post inoculation.

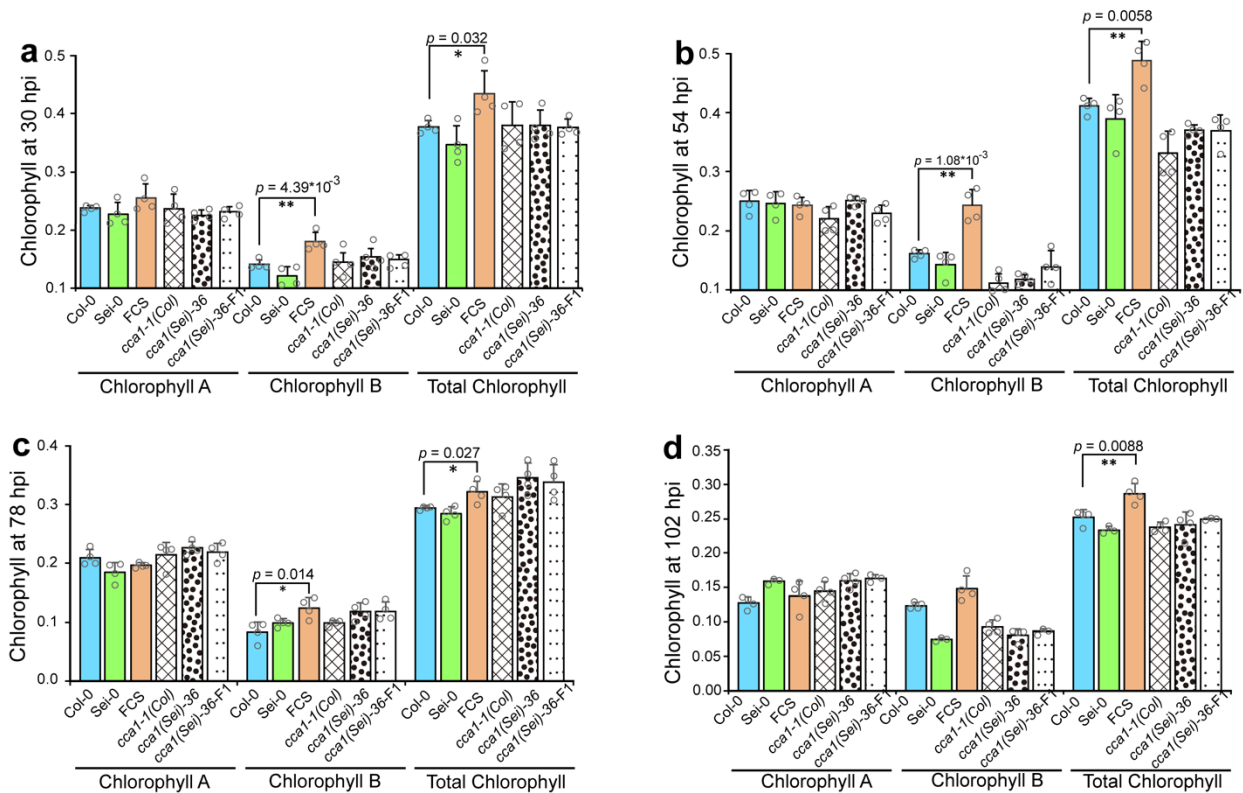

**Supplementary Fig. 18. Enhanced accumulation of chlorophyll in hybrids occurred rhythmically in the middle of each infection day.**

**a-d** Chlorophyll content (mg/g) of inoculated leaves in F<sub>1</sub> hybrids and parents of the Col-0 × Sei-0 and *cca1-1(Col)* × *cca1(sei)-36* at 30 (**a**), 54 (**b**), 78 (**c**) and 102 (**d**) hours post infiltration with *Pst* DC3000. Data are shown as the mean ± SD (n = 4, n indicates biological replicates, 6 leaves for each biological replicate). hpi, hours post inoculation. ‘\*’ *p* value < 0.05 and ‘\*\*’ *p* value < 0.01 (two-tailed Student’s *t* test).

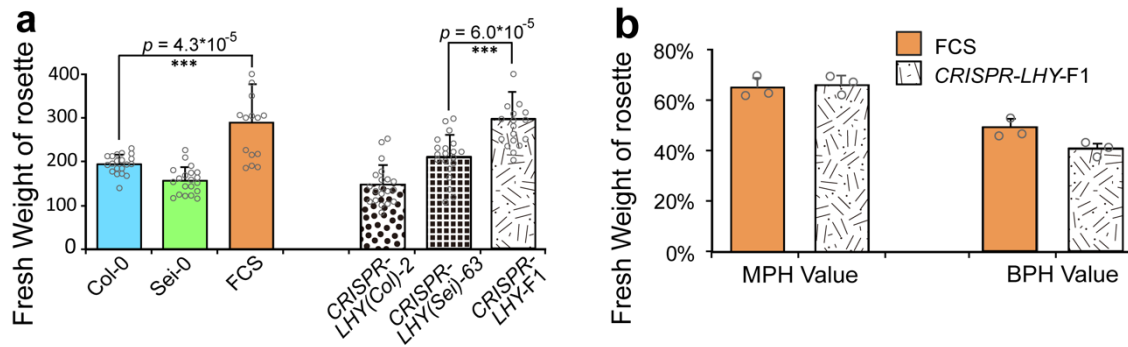

**Supplementary Fig. 19. Mutation of *LHY* did not influence the growth heterosis of FCS hybrids.**

**a** Fresh weight of the whole rosette of wild-type and *LHY*-mutated F<sub>1</sub> hybrids and parents at 5 days post infiltration with *Pst* DC3000. Data are shown as the mean  $\pm$  SD (n = 30 plants for each genotype). **b** Mid-parent heterosis (MPH) value and Best-parent heterosis (BPH) value calculated by whole rosette fresh weight at 5 days post infiltration with *Pst* DC3000 for wild-type and *LHY*-mutated F<sub>1</sub> hybrids. ‘\*\*\*’ *p* value < 0.001 (two-tailed Student’s *t* test). Data are shown as the mean  $\pm$  SD. The results in **b** are representative of three independent experiments, with measurements that were taken from independent samples grown and processed at different times.



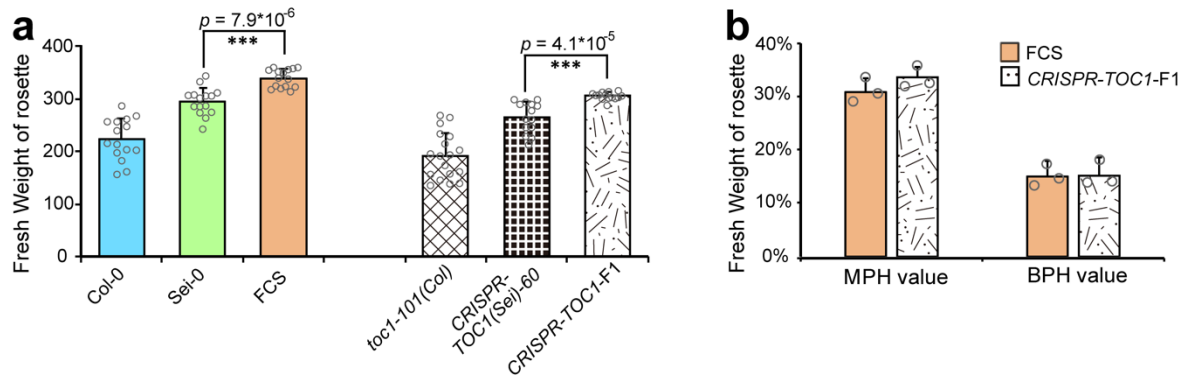

**Supplementary Fig. 20. Mutation of *TOC1* did not influence the growth heterosis of FCS hybrids.**

**a** Fresh weight of whole rosette of wild-type and *TOC1*-mutated F<sub>1</sub> hybrids and parents at 5 days post infiltration with *Pst* DC3000. Data are shown as mean  $\pm$ SD (n = 30 plants for each genotype). ‘\*\*\*’ *p* value < 0.001 (two-tailed Student’s *t* test). **b** Mid-parent heterosis (MPH) and Best-parent heterosis (BPH) values calculated by the whole rosette fresh weight at 5 days post infiltration with *Pst* DC3000 for the wild-type and *TOC1*-mutated F<sub>1</sub> hybrids. Data are shown as the mean  $\pm$ SD. The results in **b** are representative of three independent experiments, with measurements that were taken from independent samples grown and processed at different times.

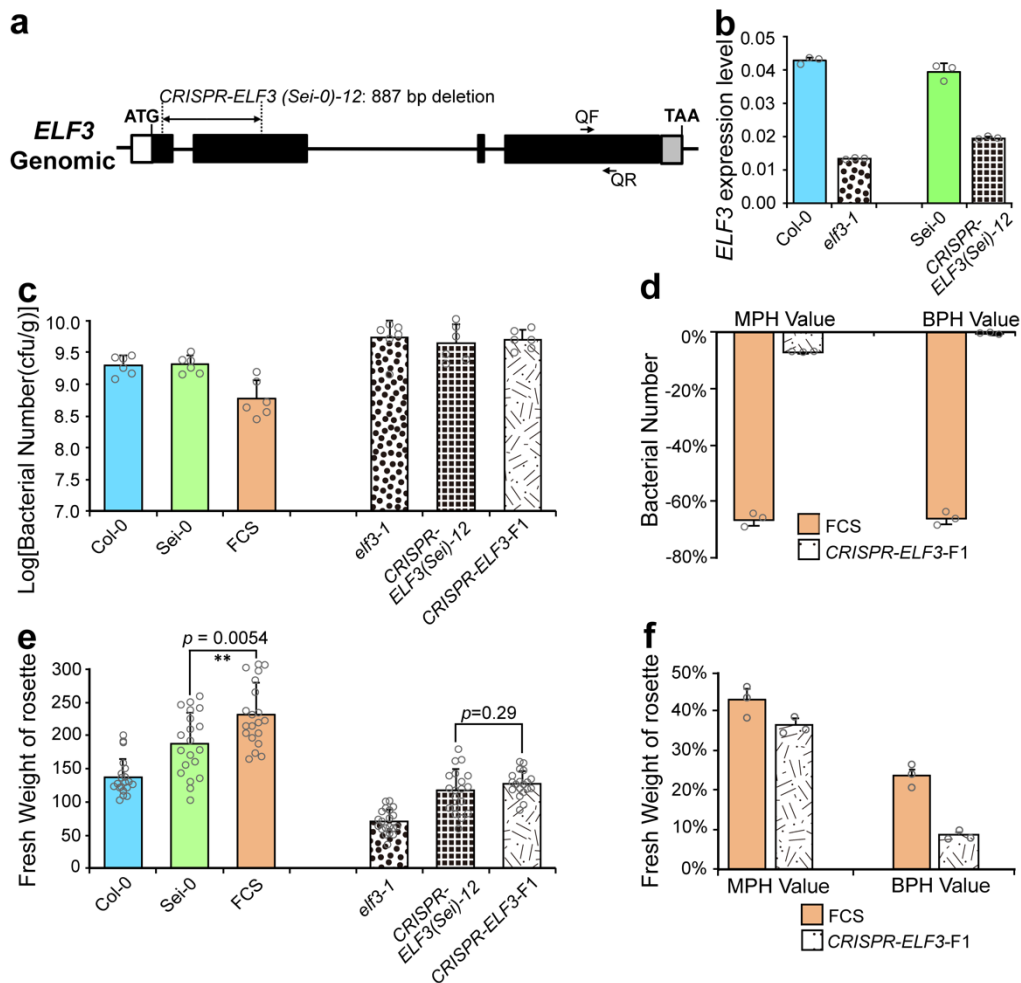

**Supplementary Fig. 21. Mutation of *ELF3* significantly decreases both defence and growth heterosis in FCS hybrids.**

**a** Gene model of *ELF3*-*CRISPR* mutants in the *Sei-0* background. White box, promoter; black boxes, exons; gray boxes, 3'UTR. Lines with arrowheads indicate the fragment deleted in *CRISPR* mutants. Primers used to test the transcript level of *ELF3* are indicated by arrows. **b** The transcript level of *ELF3* mutants and wild-type at ZT12. The transcript level of *ELF3* (ZT12, 12-day-old seedlings) is shown as the mean  $\pm$  SD (n = 3, n indicates biological replicates) and standardized for the abundance of the *ACTIN2* transcript. **c** Bacterial titer (log<sub>10</sub>) of the wild-type and *ELF3*-mutated F<sub>1</sub> hybrids and parents at 5 days post infiltration with *Pst* DC3000. Bacterial growth is expressed as the mean values of viable bacteria per gram of leaf tissue  $\pm$  SD (n = 6, n indicates biological replicates). **d** Mid-parent heterosis (MPH) and Best-parent heterosis (BPH) values calculated by bacterial number at 5 days post infiltration with *Pst* DC3000 for wild-type

and *ELF3*-mutated F<sub>1</sub> hybrids. Data are shown as the mean  $\pm$ SD. The results in **c** and **d** are representative of three independent experiments, with measurements that were taken from independent samples grown and processed at different times. **e** Fresh weight of the whole rosette of wild-type and *ELF3*-mutated F<sub>1</sub> hybrids and parents at 5 days post infiltration with *Pst* DC3000. Data are shown as the mean  $\pm$ SD (n = 30 plants for each genotype). ‘\*\*\*’  $p < 0.01$  (two-tailed Student’s *t* test). **f** MPH and BPH values calculated by the whole rosette fresh weight at 5 days post infiltration with *Pst* DC3000 for the wild-type and *ELF3*-mutated F<sub>1</sub> hybrids. Data are shown as the mean  $\pm$ SD. The results in **f** are representative of three independent experiments, with measurements that were taken from independent samples grown and processed at different times.

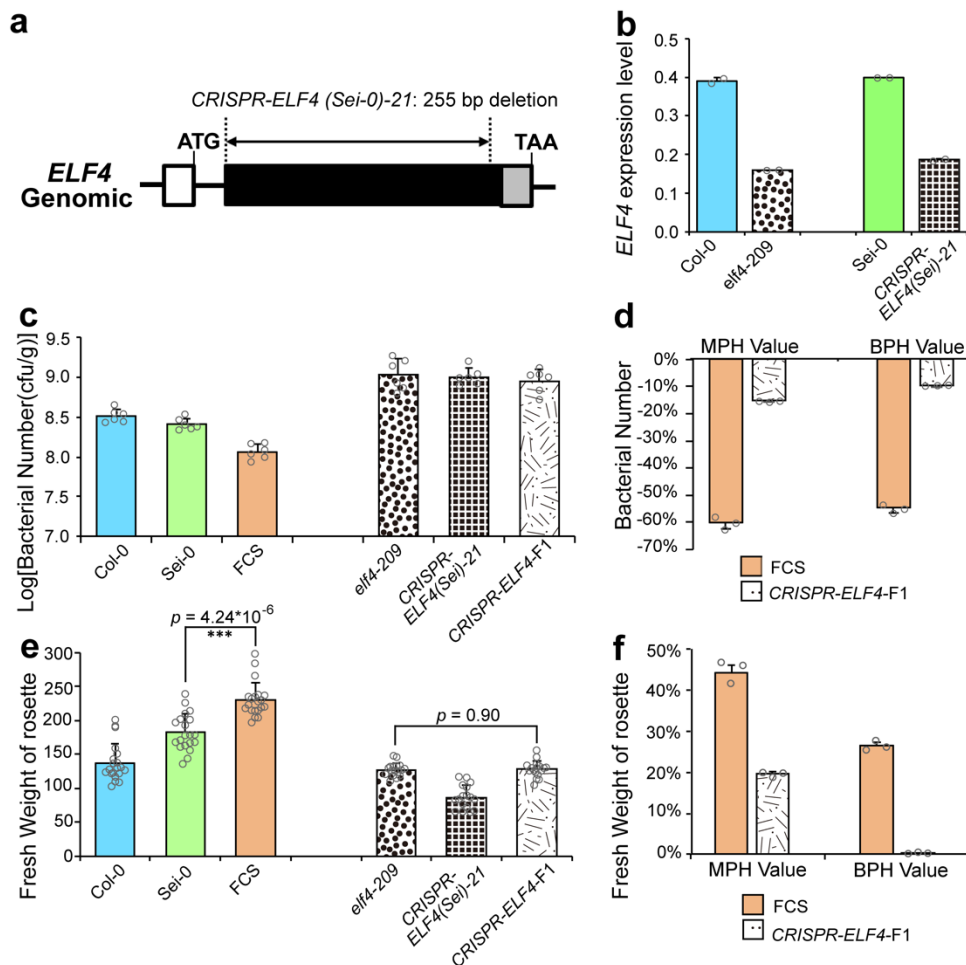

**Supplementary Fig. 22. Mutation of *ELF4* significantly decreases both defence and growth heterosis of FCS hybrids.**

**a** Gene model of *ELF4*-CRISPR mutants in *Sei-0* background. White box, promoter; black boxes, exons; gray boxes, 3'UTR. Lines with arrowheads indicate the fragment deleted in CRISPR mutants. Primers used to test the transcript level of *ELF4* are indicated by arrows. **b** The transcript level of *ELF4*-CRISPR mutants and wild-type at ZT12. The transcript level of *ELF4* (ZT12, 12-day-old seedlings) was shown as the mean  $\pm$ SD (n = 3, n indicates biological replicates) and standardized for the abundance of the *ACTIN2* transcript. **c** Bacterial titer (log10) of the wild-type and *ELF4*-mutated F<sub>1</sub> hybrid and parents at 5 days post infiltration with *Pst* DC3000. Bacterial growth is expressed as the mean values of viable bacteria per gram of leaf tissue  $\pm$ SD (n = 6, n indicates biological replicates). **d** Mid-parent heterosis (MPH) and Best-parent heterosis (BPH) values calculated by bacterial number at 5 days post infiltration with *Pst* DC3000

for wild-type and *ELF4*-mutated F<sub>1</sub> hybrids. Data are shown as the mean  $\pm$  SD. The results in **c** and **d** are representative of three replicates, with measurements that were taken from independent samples grown and processed at different times. **e** Fresh weight of the whole rosette of wild-type and *ELF4*-mutated F<sub>1</sub> hybrids and parents at 5 days post infiltration with *Pst* DC3000. Data are shown as mean  $\pm$  SD (n = 30 plants for each genotype). ‘\*\*\*’ *p* value < 0.001 (two-tailed Student’s *t* test). **f** MPH and BPH values calculated by the whole rosette fresh weight at 5 days post infiltration with *Pst* DC3000 for the wild-type and *ELF4*-mutated F<sub>1</sub> hybrids. Data are shown as the mean  $\pm$  SD. The results in **f** are representative of three independent experiments, with measurements that were taken from independent samples grown and processed at different times.

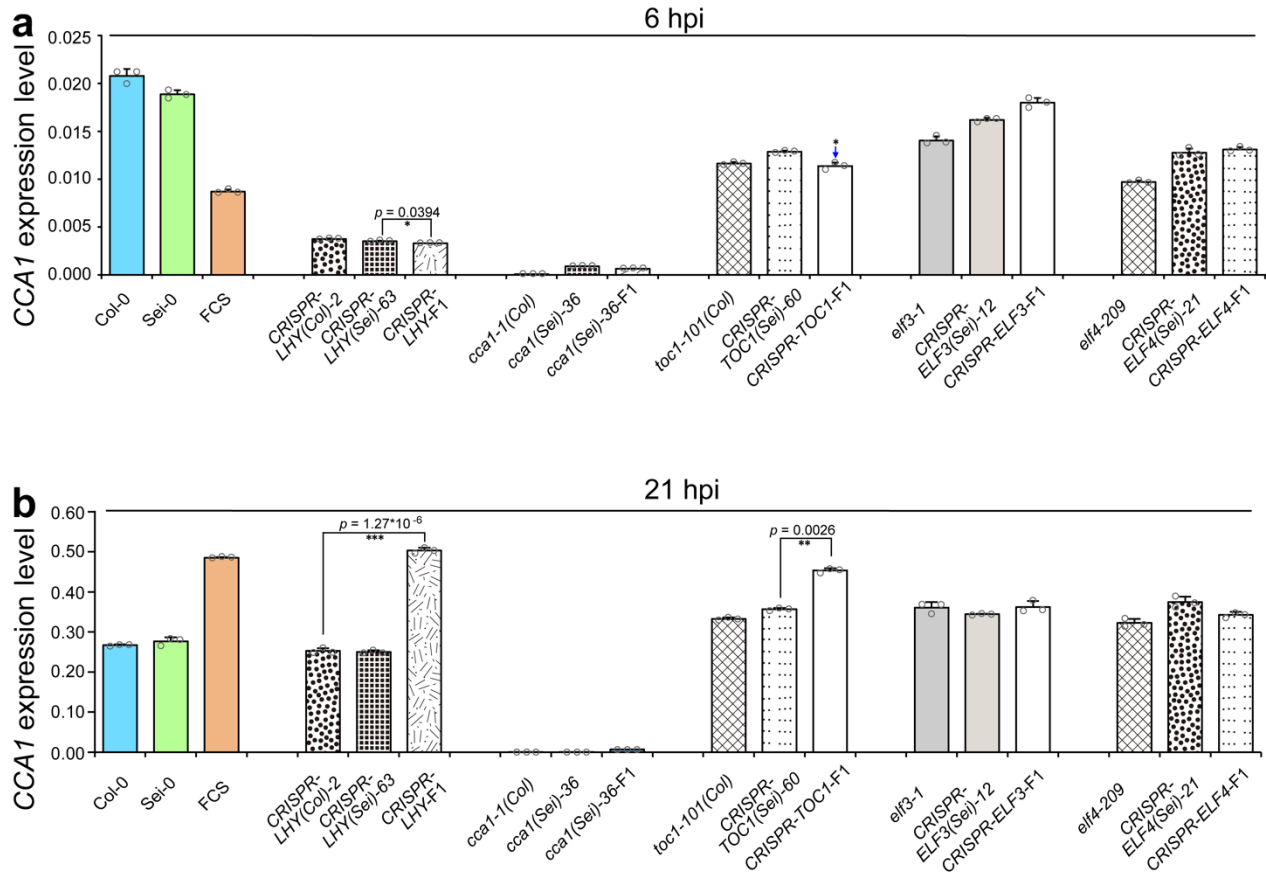

**Supplementary Fig. 23. The expression level of *CCA1* in the wild-type and *LHY*, *TOC1*, *ELF3*, and *ELF4*-mutated parents and hybrids at 6 and 21 hpi.**

Quantitative RT-PCR analysis of *CCA1*'s expression level in FCS hybrid, *LHY*, *TOC1*, *ELF3*, *ELF4*-mutated F<sub>1</sub> hybrids, and their parents (*ACTIN2* as a control) at 6 hpi (a) and 21 hpi (b). Data are shown as the mean  $\pm$ SD (n = 3, n indicates biological replicates). Arrows indicate significant down-(blue) regulation of *CCA1* in F<sub>1</sub> hybrids compared with the mid-parent value (MPV). hpi, hours post inoculation. ‘\*\*’ *p* value < 0.01; ‘\*\*\*’ *p* value < 0.001 (two-tailed Student's *t* test).

# Supplementary Tables:

**Supplementary Table 1. Genes for GO analysis in Supplementary Figure 1.**

|           |           |           |           |           |
|-----------|-----------|-----------|-----------|-----------|
| AT1G62430 | AT4G39190 | AT4G23210 | AT2G22450 | AT3G43790 |
| AT2G22970 | AT2G33150 | AT5G40720 | AT3G04550 | AT2G45850 |
| AT3G16565 | AT1G07040 | AT5G01550 | AT1G70640 | AT2G04860 |
| AT4G31290 | AT4G23550 | AT1G18570 | AT4G26530 | AT2G22830 |
| AT4G13250 | AT2G28080 | AT3G53065 | AT3G10520 | AT2G37220 |
| AT4G13340 | AT1G11210 | AT2G30395 | AT5G26570 | AT5G39210 |
| AT1G10200 | AT1G49720 | AT3G04060 | AT1G28050 | AT5G27820 |
| AT1G11530 | AT3G16180 | AT1G63720 | AT1G29670 | AT5G44260 |
| AT3G27300 | AT5G41610 | AT1G44130 | AT5G48250 | AT1G51610 |
| AT4G39260 | AT1G17190 | AT4G19970 | AT2G21660 | AT4G09020 |
| AT5G30495 | AT3G26740 | AT1G53625 | AT1G68050 | AT3G53900 |
| AT4G12290 | AT4G17670 | AT5G06690 | AT5G14320 | AT1G69040 |
| AT5G17460 | AT4G24690 | AT1G53100 | AT1G80770 | AT1G54410 |
| AT1G68820 | AT4G33985 | AT3G47800 | AT4G39460 | AT3G18680 |
| AT3G59350 | AT3G46440 | AT1G52200 | AT4G16390 | AT3G42670 |
| AT2G18170 | AT2G15960 | AT2G15890 | AT1G29070 | AT1G33770 |
| AT4G33920 | AT4G27440 | AT2G33830 | AT1G79460 | AT4G30660 |
| AT2G27660 | AT2G01818 | AT3G13610 | AT3G20230 | AT4G26370 |
| AT1G67970 | AT4G25480 | AT1G48700 | AT1G74670 | AT1G78460 |
| AT4G12480 | AT4G21830 | AT2G15090 | AT5G03940 | AT4G36180 |
| AT1G02450 | AT1G19370 | AT5G23020 | AT1G08660 | AT4G31050 |
| AT1G21680 | AT1G65690 | AT3G05130 | AT3G28860 | AT1G20030 |
| AT3G50970 | AT5G26340 | AT3G46970 | AT3G24430 | AT1G48330 |
| AT3G05880 | AT2G27200 | AT2G29630 | AT2G02070 | AT2G30424 |
| AT1G61800 | AT3G28340 | AT5G51820 | AT1G77210 | AT5G24470 |
| AT5G05410 | AT4G04330 | AT4G19120 | AT5G04360 | AT4G25490 |
| AT5G40010 | AT4G16146 | AT4G28140 | AT1G05190 | AT3G53800 |
| AT4G12500 | AT4G14270 | AT3G10020 | AT4G16141 |           |
| AT2G16700 | AT4G00700 | AT1G10760 | AT2G15970 |           |
| AT4G30190 | AT1G79450 | AT5G11150 | AT3G15570 |           |

**Supplementary Table 2. Degree of defence heterosis at 5 dpi and the CCAI's differential expression pattern at 21 hpi in 18 hybrids (Col-0 was the maternal line).**

| F <sub>1</sub> Hybrids | Paternal line stock Number | Paternal line Longitude/Latitude | MPH for bacterial number (5 days post infiltration with <i>Pst</i> DC3000) | MPH for CCAI exp. at 21 hpi |
|------------------------|----------------------------|----------------------------------|----------------------------------------------------------------------------|-----------------------------|
| Col-0 × WI-0           | CS76630                    | 10.81/47.92                      | 179.42%                                                                    | -19.38%                     |
| Col-0 × Rue3.1-31      | CS76406                    | 9.16/48.56                       | 363.87%                                                                    | -35.68%                     |
| Col-0 × Ema-1          | CS76480                    | 0.50/51.3                        | 64.08%                                                                     | -32.83%                     |
| Col-0 × Koch-1         | CS76396                    | 29.32/50.36                      | 62.14%                                                                     | -36.84%                     |
| Col-0 × WalhaesB4      | CS76408                    | 9.19/48.60                       | 150.88%                                                                    | -22.83%                     |
| Col-0 × Ca-0           | CS76459                    | 8.27/50.30                       | 123.2%                                                                     | -1.87%                      |
| Col-0 × Est            | CS76485                    | 24.99/58.67                      | 28.82%                                                                     | -21.98%                     |
| Col-0 × Aa-0           | N934                       | 9.57/50.92                       | 128.83%                                                                    | -27.60%                     |
| Col-0 × ICE107         | CS76364                    | 16.22/38.38                      | -87.23%                                                                    | -36.65%                     |
| Col-0 × NC-1           | CS76559                    | 6.25/8.62                        | -27.59%                                                                    | -5.31%                      |
| Col-0 × Bd-0           | CS76445                    | 13.29/52.46                      | -75.54%                                                                    | <u>18.08%</u>               |
| Col-0 × Ak-1           | CS76431                    | 7.63/48.07                       | -60.02%                                                                    | <u>16.74%</u>               |
| Col-0 × ICE91          | CS76362                    | 16.17/38.62                      | -34.82%                                                                    | -32.72%                     |
| Col-0 × Ba-1           | CS76441                    | -4.80/56.55                      | -75.95%                                                                    | <u>40.74%</u>               |
| Col-0 × Altai-5        | CS76433                    | 88.40/47.75                      | -80.14%                                                                    | -49.40%                     |
| Col-0 × Bay-0          | CS955                      | 11.00/49.00                      | -90.05%                                                                    | -33.63%                     |
| Col-0 × Ber            | CS76448                    | 12.00/55.00                      | -89.08%                                                                    | <u>21.47%</u>               |
| Col-0 × Ler-1          | CS6928                     | 10.87/47.98                      | -76.90%                                                                    | <u>17.01%</u>               |

MPH, mid-parent heterosis.



**Supplementary Table 3. Degree of growth heterosis at 5 dpi and the CCAI's differential expression pattern at 6 hpi in 14 hybrids (Col-0 was the maternal line).**

| F <sub>1</sub> Hybrids | MPH for Fresh weight<br>(5 days post infiltration with<br><i>Pst</i> DC3000) | BPH for Fresh weight<br>(5 days post infiltration<br>with <i>Pst</i> DC3000) | MPH for CCAI exp.<br>at 6 hpi |
|------------------------|------------------------------------------------------------------------------|------------------------------------------------------------------------------|-------------------------------|
| Col-0 × Ak-1           | 97.07%                                                                       | 91.07%                                                                       | -40.22%                       |
| Col-0 × NC-1           | 46.45%                                                                       | 40.59%                                                                       | -13.31%                       |
| Col-0 × Est            | 84.44%                                                                       | 76.44%                                                                       | -9.10%                        |
| Col-0 × Bd-0           | 116.33%                                                                      | 85.80%                                                                       | -40.01%                       |
| Col-0 × Ca-0           | -2.78%                                                                       | 2.90%                                                                        | -22.94%                       |
| Col-0 × ICE107         | 69.55%                                                                       | 78.69%                                                                       | -20.80%                       |
| Col-0 × Altai-5        | 82.93%                                                                       | 69.16%                                                                       | -8.71%                        |
| Col-0 × Rue3.1-31      | 35.76%                                                                       | 33.95%                                                                       | -19.78%                       |
| Col-0 × Bay-0          | 61.86%                                                                       | 59.14%                                                                       | -21.93%                       |
| Col-0 × Ema-1          | 95.47%                                                                       | 90.78%                                                                       | -24.41%                       |
| Col-0 × WalhaesB4      | 41.18%                                                                       | 47.35%                                                                       | 27.41%                        |
| Col-0 × Koch-1         | 63.90%                                                                       | 74.06%                                                                       | 5.54%                         |
| Col-0 × WI-0           | 26.66%                                                                       | 29.63%                                                                       | 14.94%                        |
| Col-0 × ICE91          | 103.13%                                                                      | 115.73%                                                                      | 38.39%                        |

MPH, mid-parent heterosis; BPH, best-parent heterosis.

**Supplementary Table 4. Primers used in this study.**

| <b>Experiment</b> | <b>Name</b> | <b>Sequence</b>               |
|-------------------|-------------|-------------------------------|
| <b>qRT-PCR</b>    |             |                               |
| <i>CCA1</i>       | F           | CCTCGTCAGACACAGACTTCCA        |
|                   | R           | CCGCAGTAGAATCAGCTCCAATA       |
| <i>PRI</i>        | F           | CTCATACACTCTGGTGGG            |
|                   | R           | TTGGCACATCCGAGTC              |
| <i>CBP60g</i>     | F           | AATAACGAGGAGGATGAGAACG        |
|                   | R           | TCAGACACGGTAAGAAACATCG        |
| <i>SARD1</i>      | F           | CCTCAACCAGCCCTACGTTA          |
|                   | R           | TAGTGGCTCGCAGCATATTG          |
| <i>PAD4</i>       | F           | ACCGAGGAACATCAGAGGTAC         |
|                   | R           | AAATTCGCAATGTCGAGTGGC         |
| <i>EDS1</i>       | F           | CAAGAATCTTGAAGCTGTCATTGATC    |
|                   | R           | TGTCCTGTGAACACTATCTGTTTTCTACT |
| <i>ICS1</i>       | F           | GAACTCAAATCTCAACCTCC          |
|                   | R           | ACTGCGACGAGAGAAGAAAC          |
| <i>PORA</i>       | F           | AAACCATTTGGGCCACTTTCTT        |
|                   | R           | CAAGTCTTTTCCCAGCCTCTGA        |
| <i>PORB</i>       | F           | ACCAAATCAAATCCGAACATGG        |
|                   | R           | GGCTCTTTAGCTGTCGGGAAAT        |
| <i>GWD3</i>       | F           | GCCATTGTTGCAGCTCTCCTTT        |
|                   | F           | TTCCAACCTACAAACCCATCCA        |
| <i>DPE1</i>       | F           | CCAAAACCCTGCAAATCCTCTG        |
|                   | R           | AAAGGCAGTGGCAGAAAGTTTCG       |
| <i>ACTIN2</i>     | F           | GTCTGTGACAATGGAACTGGAA        |
|                   | R           | CTTTCTGACCCATACCAACCAT        |
| <b>ChIP</b>       |             |                               |
|                   | CBP60g-p-CF | TCACTGCTGCTTCGTCAATAC         |
|                   | CBP60g-p-CR | CTAGGGCTGTTCCGAATCTTCATTG     |
|                   | CBP60g-c-CF | AGTGATGAGGTTTGGAGACTAGA       |
|                   | CBP60g-c-CR | ACGTTGTGTAACCTATTTCCG         |
|                   | SARD1-p-CF  | GATTATTCGCGTGGATCAGACTTCG     |
|                   | SARD1-p-CR  | CTGCCATGGAATTGTTCTGGTGA       |
|                   | SARD1-c-CF  | TAGACATCGTTGCTCTTCAC          |
|                   | SARD1-c-CR  | CTCGAATTGTCTGTGAACAC          |
|                   | PAD4-p-CF   | GATCACATGCTTTGATTCGC          |
|                   | PAD4-p-CR   | GTCGTCTTCTCAAAGTCTC           |
|                   | PAD4-c-CF   | GGCTAAGCTTGAGCAAGCAA          |
|                   | PAD4-c-CR   | CGAGTTCTTCGCTTTAACATCC        |
|                   | EDS1-p-CF   | GTCCACTAAAGAAAAGAGAA          |
|                   | EDS1-p-CR   | AAGATTACGACTGCTCCTGC          |
|                   | EDS1-c-CF   | CTTAGGGTTACAGCTAGAAG          |
|                   | EDS1-c-CR   | CAAGCATCCCTTCTAATGTC          |
|                   | PORB-p-CF   | GTATGGAATCCCATCAACACC         |

|                                            |                          |                                             |
|--------------------------------------------|--------------------------|---------------------------------------------|
| PORB-p-CR                                  | ACAGAGGTCACCGAAGATGT     |                                             |
| PORB-c-CF                                  | CAGCTCAGCTATGATTGATGG    |                                             |
| PORB-c-CR                                  | GAGAGGAATGTGCTCTCGGAA    |                                             |
| GWD3-p-CF                                  | GCGAAACTCTCTATAATTGATTG  |                                             |
| GWD3-p-CR                                  | GTTAACGAGTCTAGGAAAGTG    |                                             |
| GWD3-c-CF                                  | GAAGCATCTCCAAGTCATGTG    |                                             |
| GWD3-c-CR                                  | GGAGGCTATTGGAAGATGAG     |                                             |
| TOC1-p-CF                                  | TTTTATGGCCTGCACTTTTTATTG |                                             |
| TOC1-p-CR                                  | GGTGGGACTTGGGATATTTAGG   |                                             |
| TOC1-c-CF                                  | GCTACAGCCAAAAAACATCGA    |                                             |
| TOC1-c-CR                                  | GAGCCGCAAGAGCCAACAT      |                                             |
| DPE1-p-CF                                  | CACGAGAGTTTCCTTACACC     |                                             |
| DPE1-p-CR                                  | GACGGCCTAAGTAGAATCGA     |                                             |
| DPE1-c-CF                                  | CCCTCTTATGACTGGAAAGC     |                                             |
| DPE1-c-CR                                  | ATAATGACTTTCAGGTCTAC     |                                             |
| CCA1-CF1                                   | GTGTTGTAAATTCCTCAAGAC    |                                             |
| CCA1-CR1                                   | GCATAAGGCCCATATCGTTATTC  |                                             |
| CCA1-CF2                                   | CTCCATTTCCGTAGCTTCTGG    |                                             |
| CCA1-CR2                                   | CAAACAATAAGAAAGACCATGAC  |                                             |
| CCA1-CF3                                   | GATCTGAAGTTGTGTAGAGGAG   |                                             |
| CCA1-CR3                                   | GGCTTCCGAGTCTATATCAAG    |                                             |
| CCA1-CF4                                   | CTCAAGCTTCCACATGAGACTC   |                                             |
| CCA1-CR4                                   | GTTACAGGAAGACTATGGACAAG  |                                             |
| <b>Plasmid construction</b>                |                          |                                             |
| <b>CCA1 CRISPR</b>                         | CCA1-T1-DT1-BsF          | ATATATGGTCTCGATTGCAACGTGAAAGGTGGACTGGTT     |
|                                            | CCA1-T1-DT1-F0           | TGCAACGTGAAAGGTGGACTGGTTTTAGAGCTAGAAATAGC   |
|                                            | CCA1-T6-DT2-R0           | AACCCACTAGAATCGGGAGGCCCAATCTCTTAGTCGACTCTAC |
|                                            | CCA1-T6-DT2-BsR          | TTATTGGTCTCGAAACCCACTAGAATCGGGAGGCC         |
| <b>LHY CRISPR</b>                          | LHY-T1-DT1-BsF           | ATATATGGTCTCGATTGCAGCGAGAGCGATGGACTGGTT     |
|                                            | LHY-T1-DT1-F0            | TGCAGCGAGAGCGATGGACTGGTTTTAGAGCTAGAAATAGC   |
|                                            | LHY-T3-DT2-R0            | AACCGTTGTCCACAGTTGAGGTCAATCTCTTAGTCGACTCTAC |
|                                            | LHY-T3-DT2-BsR           | ATTATTGGTCTCGAAACCGTTGTCCACAGTTGAGGTC       |
| <b>TOC1 CRISPR</b>                         | TOC1-T2-DT1-BsF          | ATATATGGTCTCGATTGTGAACGGTGAGTGTAAGGGTT      |
|                                            | TOC1-T2-DT1-F0           | TGTGAACGGTGAGTGTAAGGGTTTTAGAGCTAGAAATAGC    |
|                                            | TOC1-T3-DT2-R0           | AACCCAAACCCCGATGAAGATGCAATCTCTTAGTCGACTCTAC |
|                                            | TOC1-T3-DT2-BsR          | ATTATTGGTCTCGAAACCCAAACCCCGATGAAGATGC       |
| <b>ELF3 CRISPR</b>                         | ELF3-T1-DT1-BsF          | ATATATGGTCTCGATTGGCTCCTCTAGAAACAAGAGTT      |
|                                            | ELF3-T1-DT1-F0           | TGGCTCCTCTAGAAACAAGAGTTTTAGAGCTAGAAATAGC    |
|                                            | ELF3-T2-DT2-R0           | AACCTGTGACTGATACATCTAACAATCTCTTAGTCGACTCTAC |
|                                            | ELF3-T2-DT2-BsR          | ATTATTGGTCTCGAAACCTGTGACTGATACATCTAAC       |
| <b>ELF4 CRISPR</b>                         | ELF4-T1-DT1-BsF          | ATATATGGTCTCGATTGGGGAGAGGATCCGGCGATGGTT     |
|                                            | ELF4-T1-DT1-F0           | TGGGGAGAGGATCCGGCGATGGTTTTAGAGCTAGAAATAGC   |
|                                            | ELF4-T2-DT2-R0           | AACCCACCATCGTGACCGTTCTCAATCTCTTAGTCGACTCTAC |
|                                            | ELF4-T2-DT2-BsR          | ATTATTGGTCTCGAAACCCACCATCGTGACCGTTCTC       |
| <b>Mutant screening and identification</b> |                          |                                             |
| <b>CCA1</b>                                | CCA1-Crispr-IDF          | CATTGAATCATCTCTCTAAAGG                      |
|                                            | CCA1-Crispr-IDR          | CATTGTTTTCTTCACCTCA                         |

|             |                   |                         |
|-------------|-------------------|-------------------------|
|             | CCA1-Crispr-ID-QF | CCTCGTCAGACACAGACTTCCA  |
|             | CCA1-Crispr-ID-QR | CCGCAGTAGAATCAGCTCCAATA |
| <b>LHY</b>  | LHY-Crispr-IDF    | GAGAGGATTTGAAGCAGCGA    |
|             | LHY-Crispr-IDR    | TGAGGGATGATTTTGAGGGC    |
|             | LHY-Crispr-ID-QF  | CAGGATGATTACCGTTCGTTTC  |
|             | LHY-Crispr-ID-QR  | GCAATGGCAGTTATACTTGGAG  |
| <b>TOC1</b> | TOC1-Crispr-IDF   | CTGATTTGGCCATGGAAGTA    |
|             | TOC1-Crispr-IDR   | CTGTTCATAGCAACTTGGGG    |
|             | TOC1-Crispr-ID-QF | GTTGATGGATCGGGTTTCTC    |
|             | TOC1-Crispr-ID-QR | TCATGACCCCATGCATACAG    |
| <b>ELF3</b> | ELF3-Crispr-IDF   | GTGGTGAGATCTCTATCGTAG   |
|             | ELF3-Crispr-IDR   | CTACCGAGGACTCTACAAC     |
|             | ELF3-Crispr-ID-QF | CAGCAATGGTTGATCCCTGT    |
|             | ELF3-Crispr-ID-QR | GAGGGAAGTAGCCATTACCA    |
| <b>ELF4</b> | ELF4-Crispr-IDF   | GTGTCCGATTCTACTCAGAAG   |
|             | ELF4-Crispr-IDR   | AGCTTGAACCGGACAGATTC    |
|             | ELF4-Crispr-ID-QF | CTGCCGGAAGTAGAGCTTAA    |
|             | ELF4-Crispr-ID-QR | CCACGGATTATTCTAACGAC    |
| <b>Cas9</b> | pHEE401-Cas9-IDF  | TCGAGAGCGAGTTCGTGTAC    |
|             | pHEE401-Cas9-IDR  | TTCGGTCATTAGAGGCCACG    |
